# Supplementary material for: Survey of Australian primary eyecare management of choroidal naevus patients
Source: Research Square preprint supplement (doi:10.21203/rs.3.rs-2614660/v1), 2023-03-23
Supplement: Supplementary file 1 [file 218818052f7275a7a674ffc7.docx]

**Table 1. Practice of optometrists and ophthalmologists for managing choroidal naevus**.

Frequency of correct responses (n) and Likert scale descriptive statistics for the practice section (P1 to P15, excluding P3 and P10) of the KAP survey.

| *Item Number* | *Profession* | *Frequency (%)* | *Median* | *Interquartile*  *Range* | *Independent sample t-tests (significant p ≤ 0.004)* | |
| --- | --- | --- | --- | --- | --- | --- |
| P1. I routinely dilate the pupils when I suspect there may be a pigmented fundus lesion. *(Most of the time, Sometimes, Never).* | | | | | | | | |
|  | Optometrists | 67 (72.0) | Often | 1.00 | **0.000*** | |
|  | Ophthalmologists | 80 (97.6) | Often | 0 |
|  | Combined | 147 (84.0) | Often | 0 |
| P2. I rely on undilated wide-field photography to detect choroidal naevi. *(Often, Sometimes, Never).* | | | | | | | | |
|  | Optometrists | 23 (24.7) | Sometimes | 1.00 | **0.001*** | |
|  | Ophthalmologists | 57 (69.5) | Never | 0 |
|  | Combined | 80 (45.7) | Never | 1.00 |
| P4. I am familiar with and use the “To Find Small Ocular Melanoma” system to assess the risk for malignancy. *(Always, Most of the time, Sometimes, Never).* | | | | | | | | |
|  | Optometrists | 32 (34.4) | Sometimes | 2.00 | 0.824 | |
|  | Ophthalmologists | 29 (35.4) | Often | 2.00 |
|  | Combined | 61 (34.9) | Often | 2.00 |
| P5. I am familiar with and use the “To Find Small Ocular Melanoma Using Helpful Hints Daily” system to assess the risk for malignancy. *(Always, Most of the time, Sometimes, Never).* | | | | | | | | |
|  | Optometrists | 18 (19.4) | Sometimes | 2.00 | 0.783 | |
|  | Ophthalmologists | 21 (25.6) | Never | 2.00 |
|  | Combined | 39 (22.2) | Never | 2.00 |
| P6. I am familiar with and use the “To Find Small Ocular Melanoma Doing Imaging” system to assess the risk for malignancy. *(Always, Most of the time, Sometimes, Never).* | | | | | | | | |
|  | Optometrists | 10 (10.8) | Never | 1.00 | 0.038 | |
|  | Ophthalmologists | 18 (22.0) | Never | 2.00 |
|  | Combined | 28 (16.0) | Never | 2.00 |
| P7. I refer at-risk choroidal naevi. *(Always, Most of the time, Sometimes, Never).* | | | | | | | | |
|  | Optometrists | 70 (75.3) | Often | 0 | **0.000*** | |
|  | Ophthalmologists | 47 (57.3) | Often | 1.00 |
|  | Combined | 117 (66.9) | Often | 0 |
| P8. I review [in office or refer] choroidal naevi with no risk factors [at 6-12 months, 1-2 years]. *(<6 months, 6-12 months, 1-2 years, I don’t review).* | | | | | | | | |
|  | Optometrists | 90 (96.8) | Correct | 0 | 0.007 | |
|  | Ophthalmologists | 69 (84.2) | Correct | 0 |
|  | Combined | 159 (90.9) | Correct | 0 |
| P9. I review [in office or refer] choroidal naevi with 1 or more risk factors [at <6 months, 6-12 months]. *(<6 months, 6-12 months, 1-2 years, I don’t review).* | | | | | | | | |
|  | Optometrists | 66 (71.0) | Correct | 0 | 0.168 | |
|  | Ophthalmologists | 58 (70.7) | Correct | 0 |
|  | Combined | 124 (70.9) | Correct | 0 |
| P11. When I see a new pigmented fundus lesion with no previous documented history, I perform further assessments (including but not limited to contacting previous practitioner, performing further imaging techniques, reviewing presentation). *(Always, Most of the time, Sometimes, Never).* | | | | | | | | |
|  | Optometrists | 56 (60.2) | Often | 0 | **0.004*** | |
|  | Ophthalmologists | 26 (31.7) | Often | 1.00 |
|  | Combined | 82 (46.9) | Often | 1.00 |
| P12. I would refer a 60-year-old male patient with a flat pigmented fundus lesion, with margins 10mm from the optic disc and diameter less than 4.5mm. [No]. *(Yes, No, Unsure).* | | | | | | | | |
|  | Optometrists | 78 (83.9) | - | - | 0.132 | |
|  | Ophthalmologists | 75 (91.5) | - | - |
|  | Combined | 153 (87.4) | - | - |
| P13. I would refer a 30-year-old female patient with mushroom shape pigmented fundus lesion with overlying confluent orange pigment and unexplained vision loss. [Yes]. *(Yes, No, Unsure).* | | | | | | | | |
|  | Optometrists | 93 (100.0) | - | - | 0.031 | |
|  | Ophthalmologists | 78 (95.1) | - | - |
|  | Combined | 171 (97.7) | - | - |
| P14. I would refer a 20-year-old Asian ethnic male patient with a newly presented pigmented fundus lesion, located 2mm from the optic disc. [No]. *(Yes, No, Unsure).* | | | | | | | | |
|  | Optometrists | 24 (25.8) | - | - | **0.000*** | |
|  | Ophthalmologists | 51 (62.2) | - | - |
|  | Combined | 75 (42.9) | - | - |
| P15. I would refer a 60-year-old female patient with a previously documented pigmented fundus lesion, showing 1mm diameter growth over 12 years. [No]. *(Yes, No, Unsure).* | | | | | | | | |
|  | Optometrists | 32 (34.4) | - | - | 0.008 | |
|  | Ophthalmologists | 44 (53.7) | - | - |
|  | Combined | 76 (43.4) | - | - |
| Overall mean M (SD) | | | Cronbach alpha for all practice items | | | Overall ANOVA/t-test p-value | |
|  | Optometrists | 4.91 (1.75) | 0.56 | | | 0.851 | |
|  | Ophthalmologists | 5.59 (1.73) |
|  | Combined | 5.22 (1.77) |

* and bolded indicates statistical significance, set at alpha level 0.004 for practice Items P1 to P15, excluding P3 and P10.

The medians were reported using Mann Whitney U test.

P1, P2, P4, P5 to P7 and P11 were out of a maximum score of 2.

P8 and P9 were out of a maximum score of 1.

For P2, the option ‘rarely’ is scored ‘2’.

Options are in brackets and in italics. The ‘Always’ and ‘Most of the time’ category have been collapsed to be ‘Often’. Correct answers are included in brackets where appropriate.

All participants (n=175, 100%) responded in this section, however, there were 12 missing data points.
